# Supplementary material for: Metabolic profiling of triple-negative breast cancer cells reveals metabolic vulnerabilities
Source: PubMed Central journal article supplement (PMC5568171; doi:10.1186/s40170-017-0168-x), 2017-08-22
Supplement: 40170_2017_168_MOESM2_ESM.pdf [file 40170_2017_168_MOESM2_ESM.pdf]

Figure S1

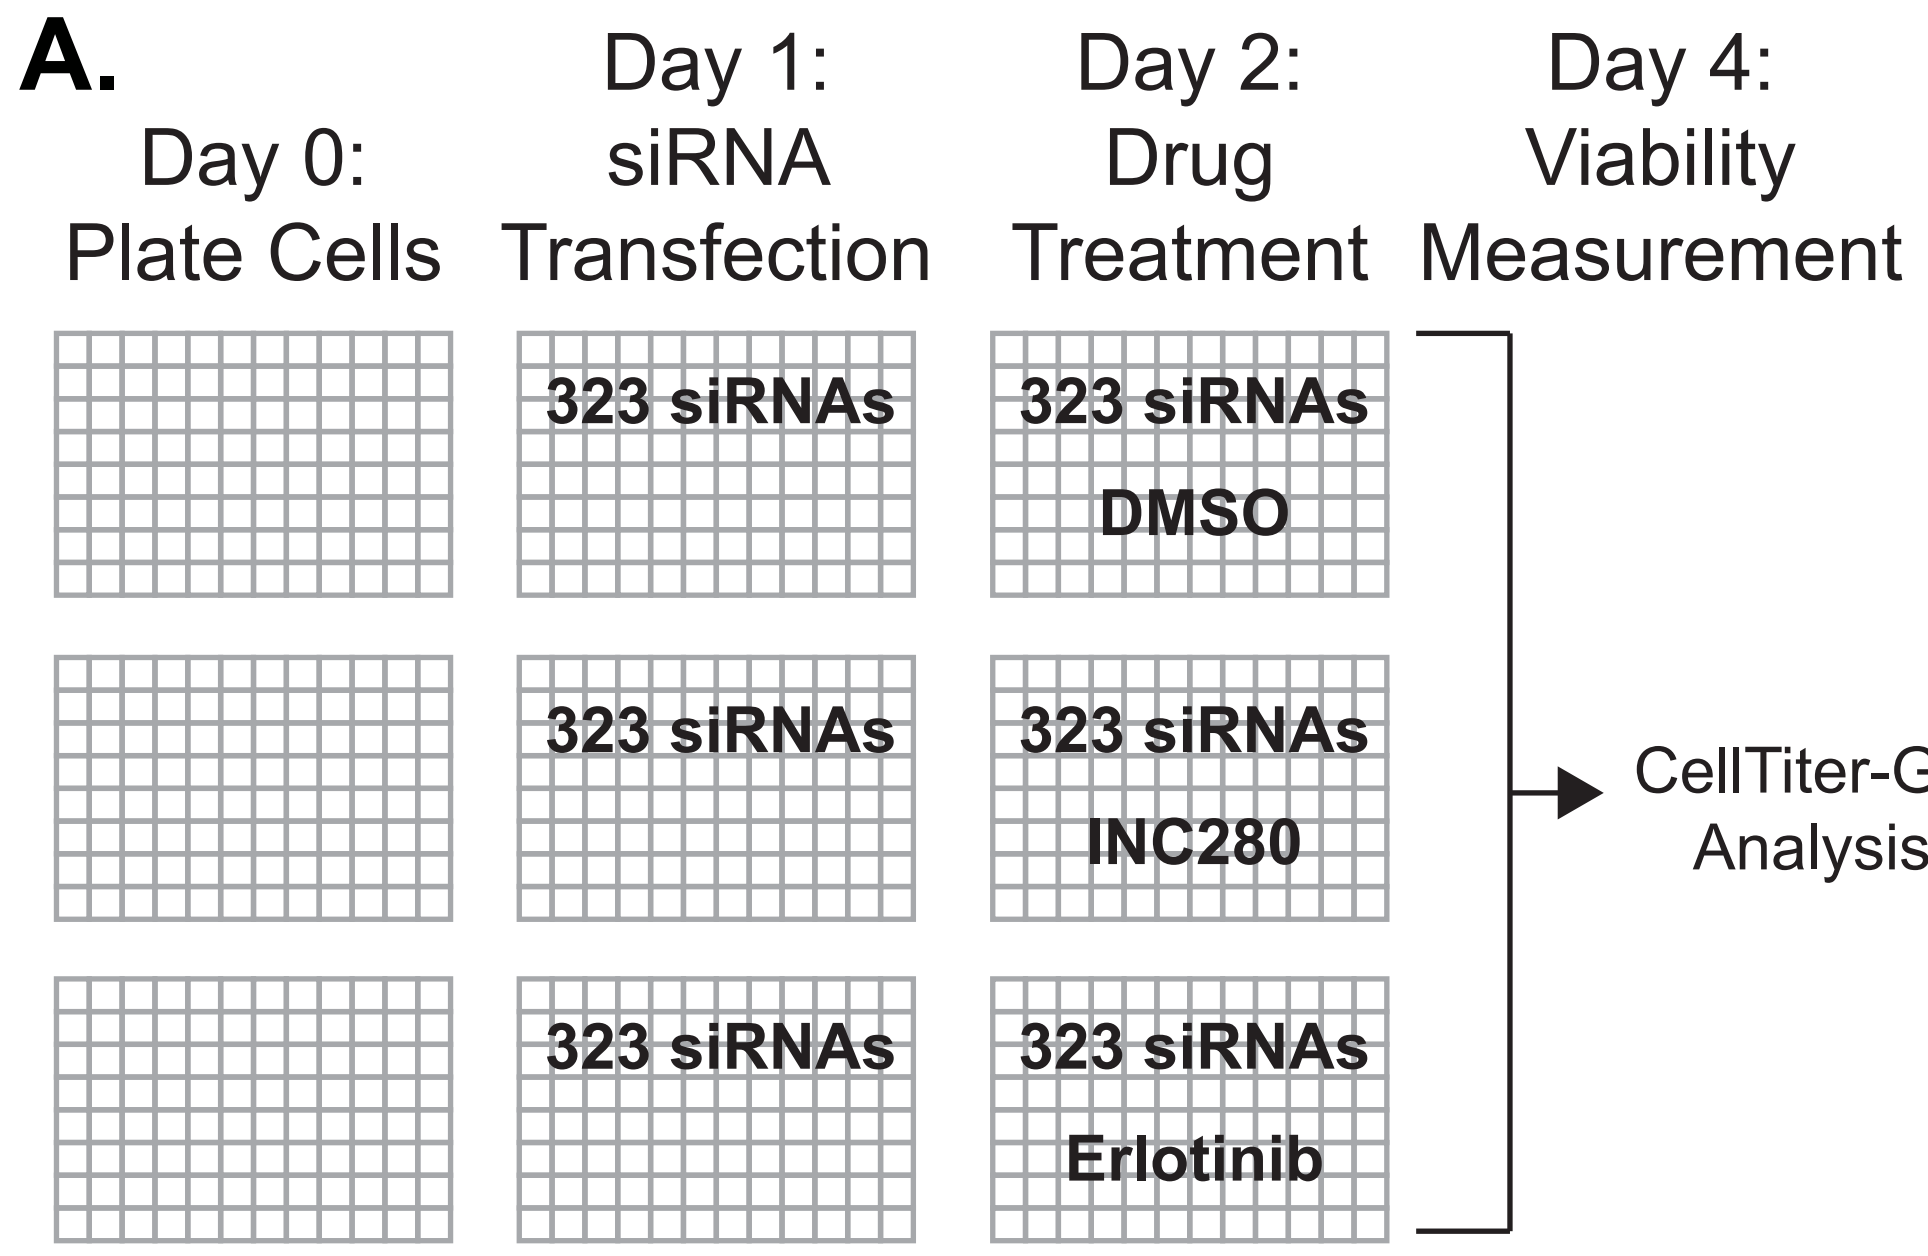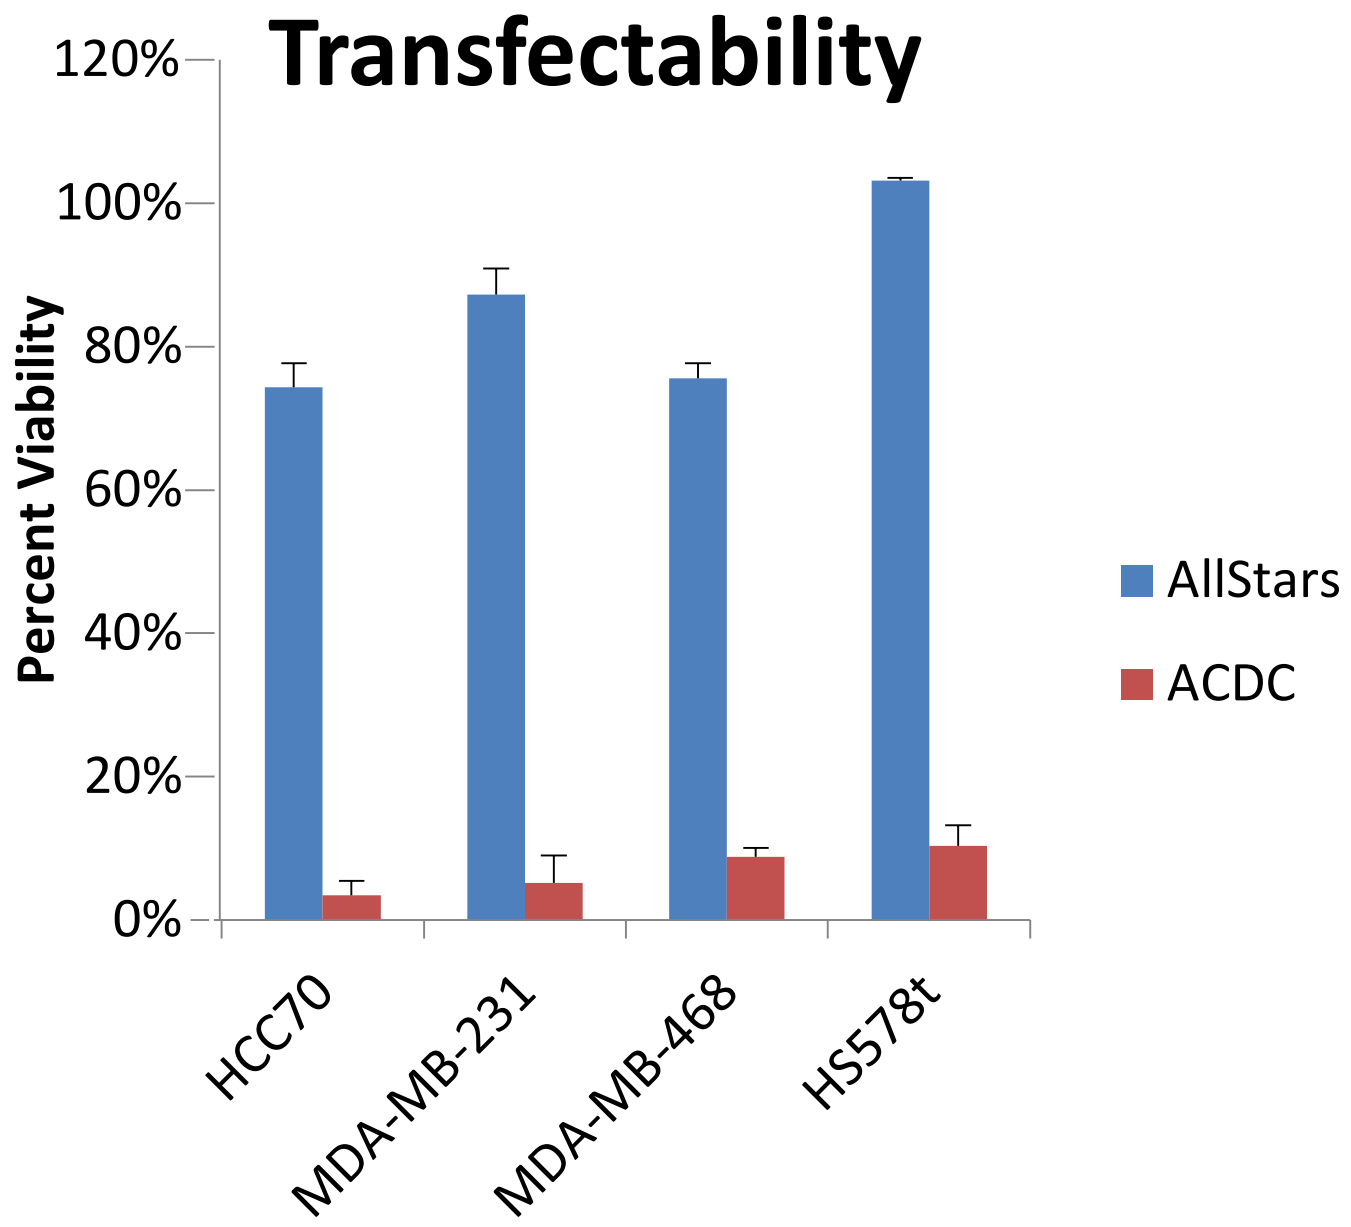

**Analysis**

$$\text{Sensitivity Index} = \left( \frac{\text{RLE siRNA + DMSO}}{\text{Control siRNA + DMSO}} \times \frac{\text{Control siRNA + Drug}}{\text{Control siRNA + DMSO}} \right) - \left( \frac{\text{RLE siRNA + Drug}}{\text{Control siRNA + DMSO}} \right)$$

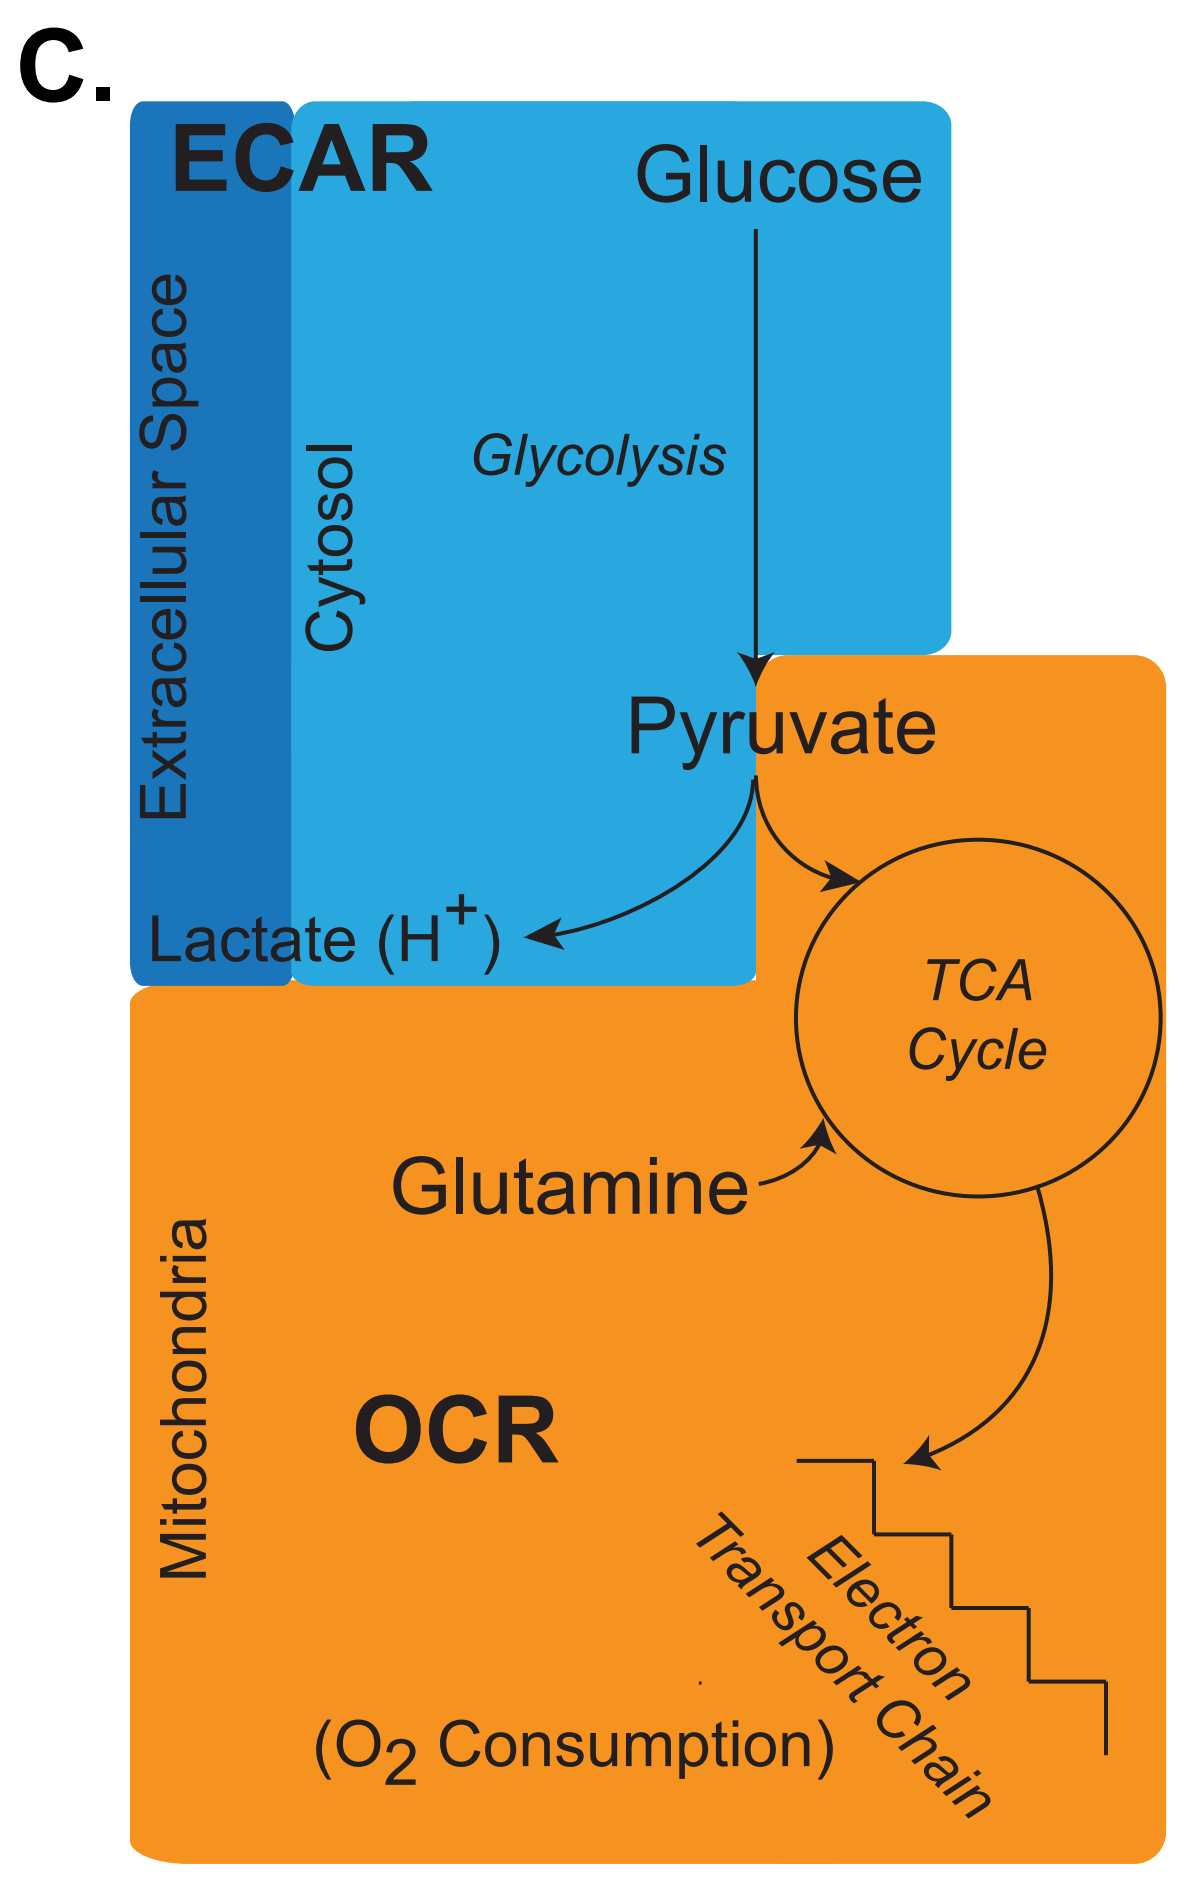

**B.**

| Cell Line  | TNBC Subtype                   | Source                                | Morphology | Mutations               |
|------------|--------------------------------|---------------------------------------|------------|-------------------------|
| hTERT-HME1 | N/A                            | Immortalized Mammary Gland Epithelium | Epithelial | N/A                     |
| MDA-MB-231 | Mesenchymal stem-like; Basal B | TNBC Metastatic                       | Epithelial | TP53; PDGFRA; NF2; BRAF |
| MDA-MB-468 | Basal-like 1; Basal A          | TNBC Metastatic                       | Epithelial | PTEN; ERBB2             |
| Hs578T     | Mesenchymal stem-like; Basal B | TNBC Metastatic                       | Epithelial | TP53; PIK3R1; NF1       |
| HCC70      | Basal-like 2; Basal A          | TNBC Primary Ductal Carcinoma         | Epithelial | TP53; RB1; PTEN; APC    |
