# Supplementary material for: Metabolic profiling of triple-negative breast cancer cells reveals metabolic vulnerabilities
Source: PubMed Central journal article supplement (PMC5568171; doi:10.1186/s40170-017-0168-x), 2017-08-22
Supplement: 40170_2017_168_MOESM7_ESM.pdf [file 40170_2017_168_MOESM7_ESM.pdf]

Figure S3

### A Metabolic Category Sensitization

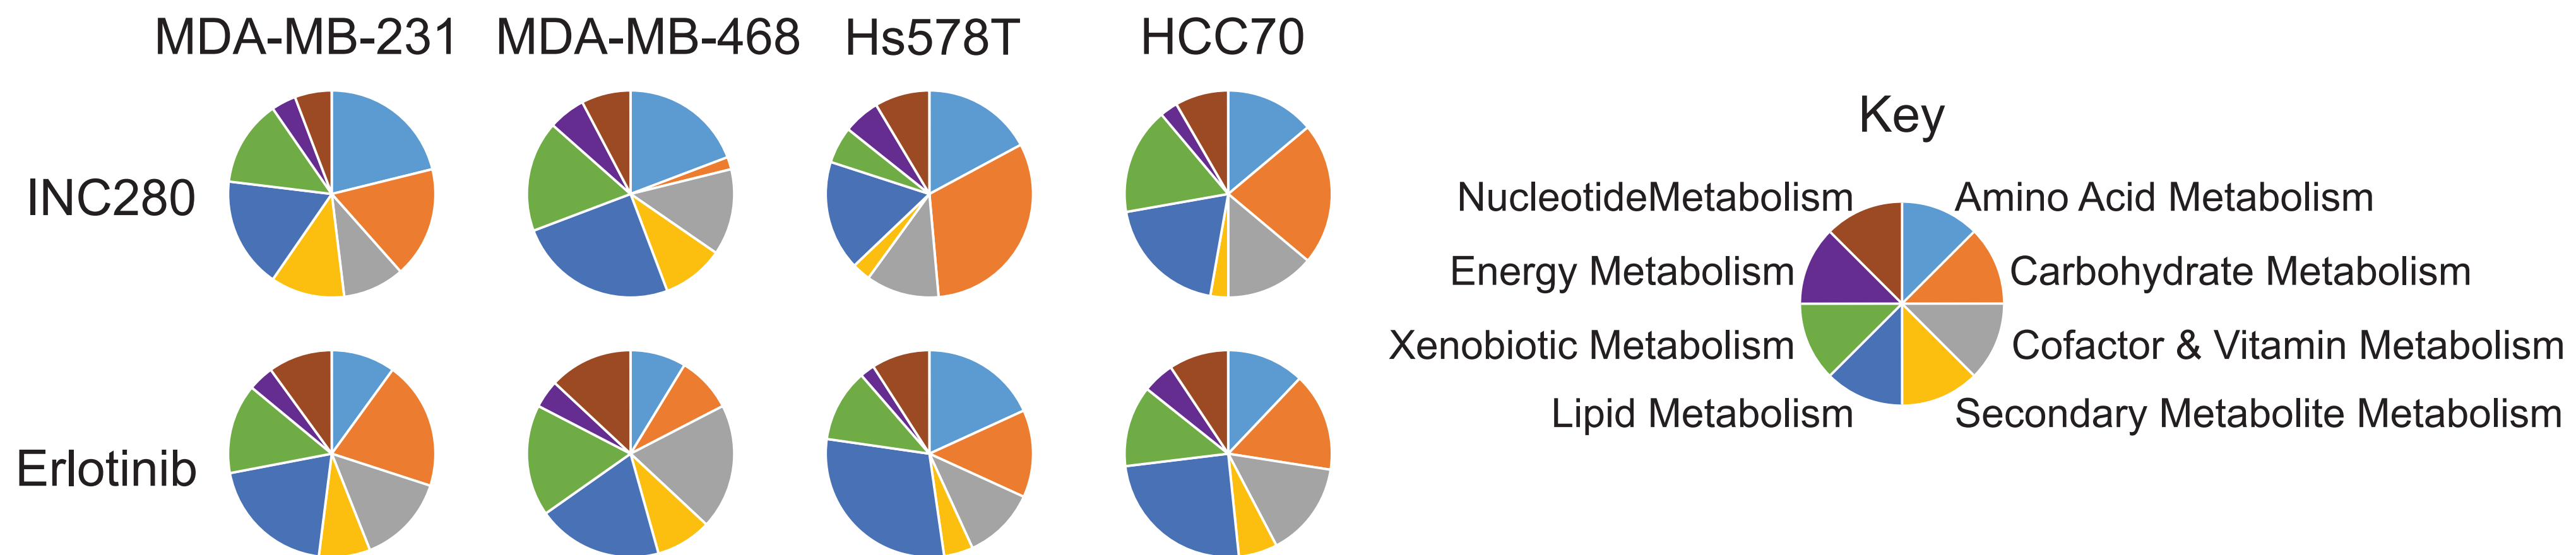

### B Metabolic Pathway Sensitization

| INC280                                      |               | Erlotinib                              |               |
|---------------------------------------------|---------------|----------------------------------------|---------------|
| Pathway                                     | Combined Hits | Pathway                                | Combined Hits |
| Cytochrome P450 Metabolism                  | 17            | Fatty Acid Metabolism                  | 16            |
| Glutathione Metabolism                      | 17            | Pyrimidine Metabolism                  | 16            |
| Tryptophan Metabolism                       | 16            | Cytochrome P450 Metabolism             | 15            |
| Drug Metabolism (non-P450)                  | 13            | Glutathione Metabolism                 | 14            |
| Fatty Acid Metabolism                       | 13            | Glycerophospholipid Metabolism         | 14            |
| Pyrimidine Metabolism                       | 11            | Purine Metabolism                      | 13            |
| Valine, Leucine, and Isoleucine Degradation | 11            | Arachidonic Acid Metabolism            | 12            |
| Androgen and Estrogen Metabolism            | 9             | Drug Metabolism (non-P450)             | 12            |
| Arachidonic Acid Metabolism                 | 9             | Ether Lipid Metabolism                 | 11            |
| Purine Metabolism                           | 9             | Nicotinate and Nicotinamide Metabolism | 11            |
